1 **Title:** *Evolution of the genetic architecture of local adaptations under genetic rescue is*  
2 *determined by mutational load and polygenicity*

3

4 **Running title:** *Local adaptations under genetic rescue*

5

6 **Authors:** Yulin Zhang<sup>1,2,\*</sup>, Aaron J. Stern<sup>2,\*,+</sup>, Rasmus Nielsen<sup>3,4,5+</sup>

7

8 <sup>1</sup>School of Life Sciences, Sun Yat-sen University, Guangzhou, Guangdong, P.R.China

9 <sup>2</sup>Graduate Group in Computational Biology, UC Berkeley, Berkeley, CA 94707, USA.

10 <sup>3</sup>Department of Integrative Biology, UC Berkeley, Berkeley, CA 94707, USA.

11 <sup>4</sup>Department of Statistics, UC Berkeley, Berkeley, CA 94707, USA.

12 <sup>5</sup>Natural History Museum of Denmark, University of Copenhagen, 1350 København K,  
13 Denmark.

14

15 \*Authors contributed equally

16 <sup>+</sup>Corresponding authors: AJS: [ajstern@berkeley.edu](mailto:ajstern@berkeley.edu), RN: [rasmus\\_nielsen@berkeley.edu](mailto:rasmus_nielsen@berkeley.edu)

17

18 **Abstract:**

19 Inbred populations often suffer from heightened mutational load and decreased fitness  
20 due to lower efficiency of purifying selection at small effective population size. Genetic  
21 rescue (GR) is a tool that is studied and deployed with the aim of increasing fitness of such  
22 inbred populations. The success of GR is known to depend on certain factors that may vary  
23 between different populations, such as their demographic history and distribution of  
24 dominance effects of mutations. While we understand the effects of these factors on the  
25 evolution of overall ancestry in the inbred population after GR, it is less clear what the effect  
26 is on local adaptations and their genetic architecture. To this end, we conduct a population  
27 genetic simulation study evaluating the effect of several different factors on the efficacy of  
28 GR including trait complexity (Mendelian vs. polygenic), dominance effects, and

29 demographic history. We find that the effect on local adaptations depends highly on the  
30 mutational load at the time of GR, which is shaped dynamically by interactions between  
31 demographic history and dominance effects of deleterious variation. While local adaptations  
32 are generally restored post-GR in the long run, in the short term they are often compromised  
33 in the process of purging deleterious variation. We also show that while local adaptations are  
34 almost always fully restored, the degree to which ancestral genetic variation comprising the  
35 trait is replaced by donor variation can vary drastically, and is especially high for complex  
36 traits. Our results provide considerations for practical GR and its effects on trait evolution.

37

38 **Keywords:** Genetic rescue; conservation genetics; local adaptations; mutational load;  
39 dominance; demographic history; polygenic traits

40

## 41 **1. Introduction**

42 Genetic rescue (GR) is a strategy used in conservation biology to increase fitness of an  
43 endangered inbred (recipient) population by introducing genetic variation from another  
44 (donor) population. GR is accomplished by assisted migration of individuals from closely  
45 related, healthy populations to the inbred imperiled population. This process naturally causes  
46 the replacement of local genetic variation in the recipient population with that of the donor  
47 population. Typically, only a small number of individuals are introduced in order to conserve  
48 local genetic variation (Whiteley, Fitzpatrick, Funk & Tallmon, 2015).

49 The strategy has now been practiced on many highly inbred populations from different  
50 taxa, including the Florida panther (Johnson et al., 2010), robins (Heber et al., 2012), guppies  
51 (Fitzpatrick et al., 2016), wood rats (Smyser et al., 2013), and adders (Madsen et al., 1999). In  
52 several cases, GR efficiently increased the absolute fitness of the inbred population and  
53 reduced inbreeding depression (Frankham, 2015). A famous example is the introduction of  
54 mountain lions from Texas of the sub-species *P. c. stanleyana* to the Florida *P. c. coryi*  
55 population, for which the number of *P. c. coryi* increased three-fold after only five years, with  
56 increased survival rates and a doubling of the heterozygosity (Johnson et al., 2010). A meta-

57 analysis provided evidence that the beneficial effect of GR can persist through the F3  
58 generation (Frankham, 2016). These empirical tests suggest that GR is a powerful  
59 conservation tool for increasing fitness in endangered inbred populations.

60 However, despite its promise, there is skepticism and caution towards the application of  
61 GR due to concerns about outbreeding depression and genetic homogenization (Bell, *et al.*  
62 2019). In the case of the Florida panther, an estimated genetic replacement of 41% has been  
63 reported. In another case of the Isle Royale wolf, the immigration of one single male to Isle  
64 Royale caused a genetic replacement of 56% to the local inbred population within two  
65 generations (Adams et al. 2011). Hwang et al (2012) also reported a negative fitness effect  
66 after practicing GR with two species that are genetically highly divergent due to outbreeding  
67 depression.

68 Several different theoretical studies have been conducted to examine the expected  
69 efficacy of GR (Hedrick, Hellsten & Grattapaglia, 2016; Harris, Zhang & Nielsen, 2019;  
70 Tallmon et al., 2004; Frankham, et al., 2011). The dynamics of GR is complex, depending on,  
71 among other factors, the amount of gene-flow, the demographic model (e.g. effective  
72 population size), and the dominance coefficients of mutations. Harris et al (2019) showed that  
73 with a higher amount of introgression, the relative fitness of the recipient population recovers  
74 more quickly; however, this occurs at the cost of replacing an increasing proportion of the  
75 recipient's ancestral genomes with those of the donor population. Demographic history of the  
76 recipient and donor populations also determines the dynamics of GR. For example, small  
77 effective population size ( $N_e$ ) limits the efficacy of natural selection; thus, in most cases  
78 admixture from a population with large  $N_e$  helps restore fitness (Harris et al., 2019). However,  
79 several studies have shown that demography and dominance of deleterious mutations have  
80 key interaction effects on the GR process (Harris et al., 2019; Kyriazis, Wayne & Lohmueller,  
81 2019). For example, Kyriazis et al (2019) showed that fitness in populations with historically  
82 low  $N_e$  can be more robust to severe bottlenecks than those with historically large  $N_e$ , as these  
83 populations are less efficient at purging recessive deleterious mutations.

84 Previous studies suggest that the genetic replacement caused by GR can be controlled if

85 the amount of admixture is limited (Harris et al., 2019; Whiteley et al., 2015; Bell et al.,  
86 2019). However, whether local adaptation plays a role in GR remains an open question.  
87 Recently, Osmond & Coop (2019) investigated the population genetic signatures of selective  
88 sweeps under evolutionary rescue, i.e. the adaptive response and recovery from reduced  
89 absolute fitness due to environmental change. Also, Tomasini & Peischl (2019) investigated  
90 the effect of local adaptations on evolutionary rescue. But whether GR would lead to the loss  
91 of unique local adaptations, or whether local adaptations could affect the process of fitness  
92 restoration by GR, remain largely unexplored.

93 Here, we explore how the addition of linked locally-adaptive variation affects the GR  
94 process. Specifically, we explore the dynamics under GR of (1) a Mendelian trait, and (2) a  
95 polygenic trait under stabilizing selection with a shift in the optimum. Our results illustrate  
96 how the genetic architecture of adaptive traits evolve under GR, and how the dynamics of GR  
97 depends on the joint effects of demographic models and genetic factors such as dominance.

98

## 99 **2. Materials and Methods**

100 We simulate under two demographic models from Harris, et al. (2019), as illustrated in  
101 Figure 1. The simulations are conducted using SLiM (Haller & Messer, 2019). Model 1 (Fig.  
102 1A) represents a population that undergoes a long-term bottleneck of 0.1 times the ancestral  
103 population size ( $N_e=10^4$ ), which last for 16,000 generations. This demographic history  
104 represents a population that is inbred for a long period of time and is similarly to that  
105 estimated for Neanderthals by Prufer *et al.* (2014). Neanderthals represent a good example of  
106 a long-term inbred population where genomic analyses have discovered a substantial  
107 accumulation of deleterious alleles (Prufer *et al.*, 2014). Model 2 (Fig. 1B) represents instead  
108 a population with an extreme, short-lived bottleneck with  $N_e=10$  that lasts for 20 generations,  
109 which might be more representative of many currently endangered species. Prior to the time  
110 of divergence, we conduct a burn-in phase of 44,000 generations. We simulate two modes of  
111 adaptation: a Mendelian trait, with only one adaptive site contributing to the trait, and a  
112 polygenic trait controlled by a large mutational target.

113 We simulate the Mendelian trait under two selection models: (1) a hard sweep, in which a  
114 rare additive beneficial mutation occurs after the split of the population, and (2) a soft sweep  
115 from a standing variant, in which an allele segregating neutrally leading up to the split is  
116 picked at random, and its selection coefficient is then changed so that the allele is then  
117 beneficial. Selection acts on the trait only after the split of two populations. For both models,  
118 we have examined different selection coefficients,  $s = 10^{-4}$ ,  $10^{-3}$ , and  $10^{-2}$  for the adaptive  
119 mutation.

120 We simulate the polygenic trait under a model of stabilizing selection with Gaussian  
121 fitness. To model the effects of local adaptation in the recipient population we allow the  
122 phenotypic optimum in this deme to increase by some amount, immediately following the  
123 divergence from the ancestral population. With  $V_S$  as the variance of the fitness function (not  
124 to be confused with the variance in fitness among individuals), we simulated scenarios where  
125 the inbred population's phenotypic optimum shifts by  $\delta = 1, 2, 5$  immediately after the split,  
126 while the phenotypic optimum remains 0 for the outbred population. We considered different  
127 selection strengths by setting the variance of the fitness function to be  $V_S = 3,000$  and  $10,000$ .  
128 We assume genetic effects among loci are purely additive. Under this model, at equilibrium  
129 (phenotypic mean equal to the optimum), alleles are under under-dominant selection with  
130  $s = a^2/V_S$ , where  $a$  is the effect of the allele, on the same scale on which the fitness  
131 function is defined (Simons, *et al.* 2018). In the transient phase after a large shift in the  
132 optimum, selection is approximately additive with  $s = a\delta/V_S$  (Hayward & Sella, 2019). In  
133 order to ensure selection coefficients of causal SNPs are roughly  $s \sim 10^{-4} - 10^{-3}$ , in line  
134 with current estimates that SNPs ascertained for complex traits in humans have been under  
135 weak selection (Simons, *et al.* 2018), we draw the effects of causal alleles ( $a$ ) from a standard  
136 normal distribution (i.e. mean 0 and variance 1). See Table S1 for more details.

137 In addition to the adaptive mutations described above, we also allow for accumulation of  
138 deleterious mutations assumed to be (1) additive ( $h=0.5$ ), (2) partially recessive ( $h=0.1$ ) and  
139 (3) recessive ( $h=0$ ), where  $h$  is the dominance coefficient. To specify a set of simulation  
140 parameters realistic for mammals, we chose parameters estimated in humans for

141 recombination rates and distribution of fitness effects. We use the UCSC exon map from the  
142 HG19 genome and the Distribution of Fitness Effect (DFE) on non-synonymous mutations  
143 estimated by (Eyre-Walker, Woolfit, & Phelps, 2006), assuming a non-synonymous mutation  
144 rate of  $7 \times 10^{-9}$  per bp/generation and log additive interactions among selected loci. A summary  
145 of the simulations is provided in Supplementary Table S1.

146 For all simulations, we have recorded fitness in the inbred population relative to that of  
147 the outbred population, the ancestry proportion in the inbred recovering population, the  
148 varying allele frequency of the adaptive mutation in the Mendelian model, and the fluctuation  
149 of mean phenotype in the stabilizing selection model.

150

### 151 **3. Results**

#### 152 *3.1 Selection on Mendelian traits*

153 We simulated a Mendelian trait that is fixed for the derived (locally adaptive) allele in the  
154 recipient population, and fixed for the ancestral allele in the donor population. We varied the  
155 selection coefficient on the trait, the dominance coefficient of the linked deleterious variation,  
156 the admixture proportion during GR, and the demographic model (Model 1 vs. Model 2, see  
157 Fig. 1).

158 We investigated the effect of GR on fitness in the recipient population (i.e. hybrid fitness,  
159 Fig. 2 A-C) as well as on ancestral genome proportion (Fig. 2 D-F). Fitness is measured by  
160 taking the average of the fitness of offspring in the recipient population, and normalizing by  
161 the same quantity for the donor population. The fitness calculated in generation  $T$  is the  
162 fitness of parents (rather than offspring produced) in generation  $T$ . We found that, depending  
163 on the demographic model and dominance of deleterious variation, GR has drastically  
164 different success in terms of achieving rapid increase in hybrid fitness. For example, when  
165 deleterious mutations are partially recessive, GR is successful but somewhat slow for Model 2  
166 (Fig. 2E). In Model 1, under the same scenario, fitness is not fully recovered even after 1000  
167 generations post admixture with 10% admixture from the donor population (Fig 2B). By  
168 contrast, under a fully recessive load, fitness is restored extremely quickly under Model 2,

169 provided sufficient admixture (1%), whereas with the same level of admixture in Model 1,  
170 fitness is not restored even in the long run (>1000 generations post admixture) (Fig 2C).  
171 Generally, we find that the lower the recipient fitness before admixture, the higher the amount  
172 of genomic replacement by the donor population in the long run (Fig. 2D-F). Furthermore, the  
173 more successful the GR is at restoring fitness, the higher the amount of genomic replacement  
174 in the long run (Fig. 2C,F). These conclusions are similar to those previously observed by  
175 Harris *et al.* (2019).

176 We also considered how ancestry and fitness evolve jointly in the recipient population  
177 (Fig. 3). Here, we show dynamics for a population under Model 2 with recessive deleterious  
178 variation. We found that in the first generation after GR, native ancestry is either 0 or 100% in  
179 the parents, where native ancestry is associated with much lower fitness (Fig. 3A). After one  
180 generation of admixture, a large proportion of offspring were inbred-outbred crosses, despite  
181 low admixture proportion (1%). Due to the large fitness advantage associated with outbred  
182 ancestry, these crossed individuals enjoyed much higher fitness than not only the inbred  
183 individuals, but also the non-crossed outbred individuals, because it is extremely rare for  
184 these crosses to be homozygous for recessive deleterious variation (it would require a  
185 recessive deleterious variant to segregate in both inbred and outbred populations since  
186 divergence up to the admixture). In the following generations, as ancestry proportions range  
187 between ~30-90%, there is a clear trend of lower native ancestry incurring increased hybrid  
188 fitness (Fig. 3C,D)

189 A short term bottleneck (Model 2) does not increase or decrease the average number of  
190 mutations an individual carries. However, it will allow recessive deleterious mutations of  
191 strong effect, which were already segregating in the population, to increase in frequency and  
192 potentially go to fixation (while others are lost). Models of recessive mutations allow for  
193 much more standing variation of deleterious mutations, that potentially can increase in  
194 frequency during the bottleneck, than models of additive mutations (e.g. Fig. 2A vs 2C). GR  
195 is particularly effective in this case because the recipient population may have fixed strongly  
196 deleterious recessive mutations that can be purged immediately after GR (Fig. 2C). In the case

197 of a constant low population size (Model 1), deleterious mutations (both in the recessive and  
198 additive model) will accumulate and can slowly go to fixation if they have weak effects, but  
199 one is unlikely to observe the same kind of strong effect of strongly deleterious recessive  
200 mutations going to fixation as you would in models with recessive mutations and a bottleneck  
201 (Fig. 2B-C).

202 Next, we looked at the dynamics of local adaptations under a Mendelian trait model (i.e.,  
203 a single adaptive allele). We found that, in the short term (0-100 generations post-GR) the  
204 adaptive allele decreases in frequency following the loss of ancestral DNA fractions (Fig. 4;  
205 Fig. S1), which is the consequence of a selection-induced reduction in native ancestry after  
206 the admixture (Fig. 2D-F). However, while the ancestral genome proportion continued to  
207 decline slowly after 10 generations after GR (Fig. 2D-F), the adaptive allele generally  
208 increased in frequency after 10-100 generations when enough recombination occurred to  
209 break up linkage between the adaptive allele and the deleterious alleles. However, even for  
210 very strong selection ( $s = 0.01$ ), it took hundreds of generations for the adaptive allele to reach  
211 high frequency in the population. In some extreme cases, with sufficiently high levels of  
212 admixture (10%), GR under Model 2 actually caused the adaptive allele to be lost with high  
213 probability after a total genetic replacement when the selection coefficient is sufficiently small  
214 ( $\leq 0.001$ ) (Fig. 4F).

215 We also examined the joint effects of dominance coefficients of linked deleterious  
216 variation and demographic history on the efficacy of GR. Under both model I and II, we saw a  
217 greater degree of genetic replacement (Figure 2D-F), leading to a greater reduction in the  
218 frequency of the adaptive allele, as deleterious mutations become more recessive (Fig. 3 &  
219 S1). For example, there was a smaller short-term reduction in allele frequency of the adaptive  
220 allele under Model 2 (Fig. 4D-F, Fig. S1 D-F, relative to Model 1 [Fig. 4A-C, Fig. S1 A-C])  
221 but a larger reduction for partially recessive/recessive deleterious variants (Fig. 4B,C,E,F, Fig.  
222 S1 B,C,E,F), following the same pattern of the ancestral DNA proportion decline in those  
223 scenarios (Fig 4. G-H). However, the locally adaptive locus itself had only a minor effect on  
224 the recovery of relative fitness and reduction of ancestral DNA proportion of the recipient



225 population (Fig. 4, 5, S1, S2, S3). We considered that sweeps from standing variation may  
226 have different patterns of linked deleterious variation around the adaptive allele; however,  
227 when simulating under alternative selection models we found no difference between the hard  
228 vs soft sweep models (see Fig. 4, S2, S3 vs Fig. S4, S5, S6).

229

### 230 *3.2 Polygenic adaptation*

231 We also simulated a polygenic trait under a model of stabilizing selection with a shift in  
232 the optimum (Fig. 5-7). Here we varied the strength of stabilizing selection on the trait  
233 (controlled by  $\sqrt{V_S}$ , the ‘width’ of the fitness function), the size of the shift in the local  
234 optimum after population 2 diverges from population 1,  $\delta = 0,1,2,5$ , measured in units of  
235  $\sqrt{V_S}$ ), dominance coefficient of deleterious mutations, admixture fraction during GR as well  
236 as demographic model.

237 We examined two features of polygenic trait evolution: first, we evaluated the effect of  
238 GR on the perturbation of the adaptive phenotype from its optimum (Fig. 5, Fig. S7); we  
239 measure this by looking at the average distance of the population mean phenotype from the  
240 optimum. We also considered the extent of replacement of ancestral variation causal for the  
241 trait (Fig. 6); we measure this replacement by examining the relative proportion of genetic  
242 variance of the trait due to ancestral variation vs donor variation introduced by GR.

243 We found that under Model 1, polygenic adaptations are not significantly affected by GR,  
244 as the trait’s evolution appears to follow the same trajectory regardless of admixture  
245 proportions or dominance coefficients of the deleterious load (Fig. 5A-C). However, under  
246 Model 2, we found that following rapid phenotypic drift from the optimum due to a severe  
247 bottleneck (Fig. S7), polygenic adaptations subsequently follow dramatically different  
248 trajectories depending on several factors (Fig. 5D-F): for example, GR allows the polygenic  
249 adaptation to recover to its optimal value much more quickly than without GR (Fig. 5F); and  
250 this effect is most pronounced under scenarios where there is fully recessive load (Fig. 5F),  
251 although it is still significant under a partially recessive load (Fig. 5E).

252 We also explored how the genetic basis of the polygenic adaptation in the recipient

253 population is replaced by donor variation (Fig. 6). We quantify this using the proportion of the  
254 genetic variance attributable to standing variation in the recipient population just before  
255 admixture; genetic variance post-admixture is the sum of this quantity, plus genetic variance  
256 attributable to standing variation in the donor population just before admixture, plus that of *de*  
257 *novo* mutations occurring in the recipient population post-admixture (although this has  
258 negligible contributions over short timescales). Generally, we find that the genetic basis is  
259 quickly replaced due to GR, with >90% of the genetic variance being replaced with donor  
260 variation when GR is most successful; for example, under Model 2, especially when the  
261 deleterious load is recessive and the admixture fraction is high (Fig. 6A). Broadly, patterns of  
262 genetic variance replacement are consistent with patterns of ancestry replacement (Fig. 6 *vs.*  
263 Fig. 2D-F), with stronger replacement in situations where GR is more successful at recovering  
264 fitness. However, details of the local adaptation do affect the dynamics of how the genetic  
265 variance evolves; for example, when the optimal phenotype is more highly diverged in the  
266 recipient *vs* donor population, the fraction of the genetic variance replaced by the donor  
267 population is lower (Fig. 6B), because in this case donor individuals are more poorly adapted  
268 to the environment of the recipient population, and thus GR is countervailed by this force.

269 Lastly, we directly compared hybrid fitness trajectories under the Mendelian *vs.*  
270 polygenic trait models (Fig. 7). We found that, under the simulations models we considered,  
271 varying parameters controlling the local adaptation does not have any appreciable effect on  
272 hybrid fitness as an outcome of GR. In Fig. 7 we compare simulations of a Mendelian trait  
273 under strong selection *vs.* a polygenic trait under strong stabilizing selection (see Methods).  
274 The results are comparable both under Model 1 and Model 2 (Fig. 7A,B *vs* 7C,D) and under  
275 various levels of dominance (Fig. 7).

276

#### 277 **4. Discussion**

278 We have presented a population genetic simulation study that elucidates the dynamics of  
279 local adaptation and genetic rescue (GR). We considered various models of the selection  
280 strength and architecture of the adaptive trait, dominance of the mutational load, demography,

281 and admixture. The results of our simulations show that when a locally adaptive trait consists  
282 of a single locus (e.g. a Mendelian trait), GR decreases the allele frequency in the short term.  
283 Dominance of the linked deleterious variants and demographic history of the population  
284 jointly determine the degree of its short-term loss while the strength of positive selection  
285 determines the rate of trait recovery.

286       There are substantial differences in the evolutionary dynamics of the Mendelian trait and  
287 the polygenic trait under GR. In simulations of a polygenic trait, the consequences of GR on  
288 the trait is decided by both the loss of genetic materials as a whole and the distance between  
289 the phenotype and its optimum before admixture. Generally speaking, it takes about 100  
290 generations for a polygenic trait to return to its optimum in most cases, which is shorter than  
291 that for a Mendelian trait under the same situation. Because polygenic traits have large  
292 mutational targets, causal genetic variation that was previously exclusive to the donor  
293 population is introduced to the inbred population via GR; this variation quickly replaces  
294 native causal genetic variation, which is linked to many deleterious alleles. Thus, the  
295 apparently higher efficiency with which the polygenic adaptation is restored comes at the cost  
296 of long-term replacement by genetic variation from the donor population. We also showed  
297 that the distance of the phenotypic optimum between the donor and the recipient population  
298 has appreciable influence on how much genomic replacement is incurred by GR.

299       Our results demonstrate a marked difference between a long-term small effective  
300 population size (Model 1) and a short-term severe bottlenecks (Model 2), with the latter  
301 interacting strongly with the dominance of the deleterious mutation load. Our simulations  
302 assume that, following GR/admixture, the effective population size of the recipient population  
303 immediately recovers to the full size of the ancestral population. Future directions could  
304 consider more gradual recoveries in the effective population size, possibly by using  
305 evolutionary rescue models such as those discussed by Osmond & Coop (2019). Thus, our  
306 models show GR operating at the upper limit of its efficiency, since the aforementioned  
307 alternative models would have strictly lower effective population sizes in the short term  
308 following admixture.

309 One caveat of our results is that our simulations do not assume epistasis and, therefore,  
310 does not allow for the evolution of Dobzhansky-Muller incompatibilities (DMIs). However, in  
311 the presence of DMIs, outbreeding depression may lead to limited genetic replacement or  
312 even reduce the absolute fitness after GR.

313 Although our results suggest that locally adaptive traits, especially those that are  
314 Mendelian or moderately polygenic, will be strongly affected by GR in the short term, but the  
315 causal variant is generally retained and returns to fixation in the long run. While locally  
316 adaptive polygenic traits are less susceptible to shifts due to GR, their underlying genetic  
317 architecture is highly susceptible to long-term replacement by donor ancestry.

318

## 319 **References**

- 320 Adams, J. R., Vucetich, L. M., Hedrick, P. W., Peterson, R. O. & Vucetich, J. A. (2011).  
321 Genomic sweep and potential genetic rescue during limiting environmental conditions in  
322 an isolated wolf population. *Proc. R. Soc. B*.278:3336–3344.
- 323 Bell, D. A., Robinson, Z., Funk, W. C., Fitzpatrick, S. W., Allendorf, F. W., Tallmon, D. A., &  
324 Whiteley, A. R. (2019). The Exciting Potential and Remaining Uncertainties of Genetic  
325 Rescue. *Trends in Ecology and Evolution*, 34(12), 1070-1079.
- 326 Eyre-Walker, A., Woolfit, M., & Phelps, T. (2006). The distribution of fitness effects of new  
327 deleterious amino acid mutations in humans. *Genetics*, 173(2), 891–900.
- 328 Fitzpatrick, S. W., Gerberich, J. C., Angeloni, L. M., Bailey, L. L., Broder, E. D., Torres-  
329 Dowdall, J., Handelsman, C. A., López-Sepulcre, A., Reznick, D. N., Ghalambor, C. K.,  
330 & Chris Funk, W. (2016). Gene flow from an adaptively divergent source causes rescue  
331 through genetic and demographic factors in two wild populations of Trinidadian guppies.  
332 *Evolutionary applications*, 9(7), 879–891.
- 333 Frankham, R., Ballou, J.D., Eldridge, M.D.B., Lacy, R.C., Ralls, K., Dudash, M.R. & Fenster,  
334 C.B. (2011), Predicting the Probability of Outbreeding Depression. *Conservation*  
335 *Biology*, 25: 465-475.
- 336 Frankham, R. (2015). Genetic rescue of small inbred populations: meta-analysis reveals large

- 337 and consistent benefits of gene flow. *Molecular Ecology*, 24(11), 2610-2618.
- 338 Frankham, R. (2016). Genetic rescue benefits persist to at least the F3 generation, based on a  
339 meta-analysis. *Biol. Conserv.*, 195, 33-36
- 340 Haller, B. C., & Messer, P. W. (2019). SLiM 3: Forward Genetic Simulations Beyond the  
341 Wright–Fisher Model. *Molecular Biology and Evolution*, 36(3), 632-637.
- 342 Harris, K., Zhang, Y., & Nielsen, R. (2019). Genetic rescue and the maintenance of native  
343 ancestry. *Conservation Genetics*, 20(1), 59-64.
- 344 Hayward, L. K., & Sella, G. (2019). Polygenic adaptation after a sudden change in  
345 environment. *bioRxiv*,
- 346 Heber, S., Varsani, A., Kuhn, S., Girg, A., Kempenaers, B., & Briskie, J. (2012). The genetic  
347 rescue of two bottlenecked South Island robin populations using translocations of inbred  
348 donors. *Proceedings. Biological sciences*, 280(1752), 20122228.
- 349 Hedrick, P. W., & Garciadorado, A. (2016). Understanding Inbreeding Depression, Purging,  
350 and Genetic Rescue. *Trends in Ecology and Evolution*, 31(12), 940-952.
- 351 Hedrick, P. W., Hellsten, U., & Grattapaglia, D. (2016). Examining the cause of high  
352 inbreeding depression: analysis of whole - genome sequence data in 28 selfed progeny  
353 of *Eucalyptus grandis*. *New Phytologist*, 209(2), 600-611.
- 354 Hedrick, P. W., Robinson, J. A., Peterson, R. O. & Vucetich, J. A. (2019) Genetics and  
355 extinction and the example of Isle Royale wolves. *Anim. Conserv.*, 22(3), 302-309
- 356 Hwang, A. S., Northrup, S. L., Peterson, D. L., Kim, Y., & Edmands, S. (2012). Long-term  
357 experimental hybrid swarms between nearly incompatible *Tigriopus californicus*  
358 populations: persistent fitness problems and assimilation by the superior population.  
359 *Conservation Genetics*, 13(2), 567-579.
- 360 Johnson, W. E., Onorato, D. P., Roelke, M. E., Land, E. D., Cunningham, M. W., Belden, R.  
361 C., ... & Obrien, S. J. (2010). Genetic Restoration of the Florida Panther. *Science*,  
362 329(5999), 1641-1645.
- 363 Kyriazis, C. C., Wayne, R. K., & Lohmueller, K. E. (2019). High genetic diversity can  
364 contribute to extinction in small populations. *bioRxiv*.

- 365 Madsen, T., Shine, R., Olsson, M. et al. (1999). Restoration of an inbred adder population.  
366 Nature 402, 34–35.
- 367 Osmond, M. M., & Coop, G. (2019). Genetic signatures of evolutionary rescue by a selective  
368 sweep. bioRxiv.
- 369 Prufer, K., Racimo, F., Patterson, N., Jay, F., Sankararaman, S., Sawyer, S., ... & Paabo, S.  
370 (2014). The complete genome sequence of a Neanderthal from the Altai Mountains.  
371 Nature, 505(7481), 43-49.
- 372 Simons, Y. B., Bullaughey, K., Hudson, R. R., & Sella, G. (2018). A population genetic  
373 interpretation of GWAS findings for human quantitative traits. *PLoS biology*, 16(3),  
374 e2002985.
- 375 Smyser, T. J., Johnson, S. A., Page, L. K., Hudson, C. M., & Rhodes, E. J. (2013). Use of  
376 experimental translocations of Allegheny woodrat to decipher causal agents of decline..  
377 Conservation Biology, 27(4), 752-762.
- 378 Tallmon, D. A., Luikart, G., & Waples, R. S. (2004). The alluring simplicity and complex  
379 reality of genetic rescue. *Trends in Ecology and Evolution*, 19(9), 489-496.
- 380 Tomasini, M., & Peischl, S. (2019). When does gene flow facilitate evolutionary rescue.  
381 bioRxiv.
- 382 Whiteley, A. R., Fitzpatrick, S. W., Funk, W. C. & Tallmon, D. A. (2015) Genetic rescue to  
383 the rescue. *Trends in Ecology & Evolution* 30: 42-49.

384

### 385 **Data accessibility**

386

387 Scripts are available on GitHub at [https://github.com/YulinZhang9806/GR\\_adaptation\\_scripts](https://github.com/YulinZhang9806/GR_adaptation_scripts).

388

### 389 **Authors contribution**

390

391 AJS and RN conceptualized the study; YZ and AJS designed the methods; YZ wrote the  
392 software; YZ and AJS conducted the analysis; YZ and AJS wrote the manuscript; YZ, AJS, and  
393 RN edited the manuscript; AJS and RN supervised the research.

394

A. Model 1

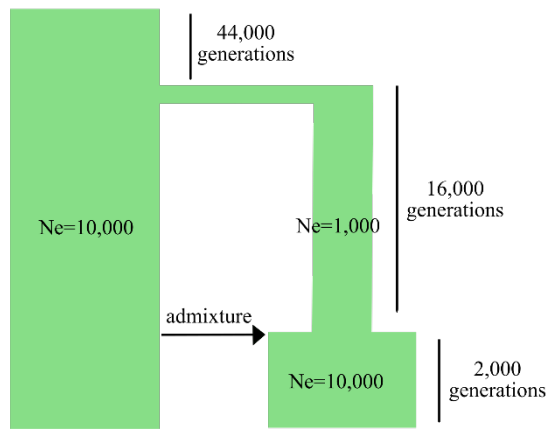

B. Model 2

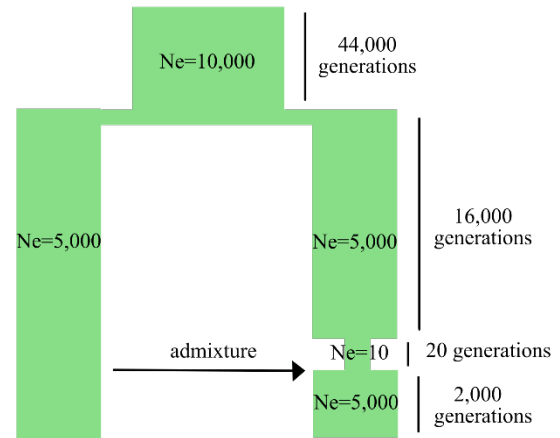

**Figure 1.** Two demographic models used for simulations. Time runs from top to bottom. Admixture happens at the generation right after the population size increases and lasts for only one generation. Population size changes are assumed to be discrete as depicted in the figure. Samples are taken from the inbred population on the right ( $p_2$ ) after the admixture up to 2,000 generations.

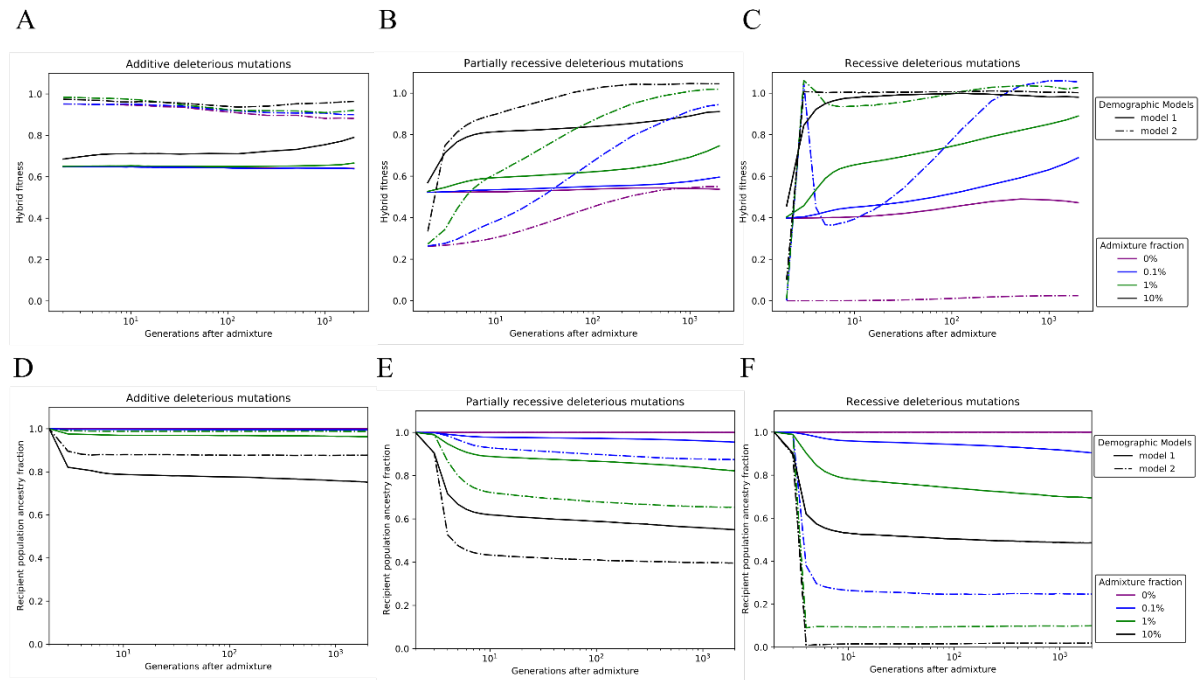

**Figure 2.** (A-C) Hybrid fitness change of the inbred population after admixture and (D-F) Recipient population ancestral genome fraction changes after GR with a Mendelian adaptive trait, under hard sweep selection model and demographic Model 1 (solid lines) and demographic Model 2 (dashed lines). The adaptive mutation is additive (dominance coefficient  $h=0.5$ ) while selection coefficient is set differently (shown with different line styles in A-F). Deleterious mutations are assumed additive ( $h=0.5$ ) in A, D, partially recessive ( $h=0.1$ ) in B,E and recessive ( $h=0$ ) in C,F.



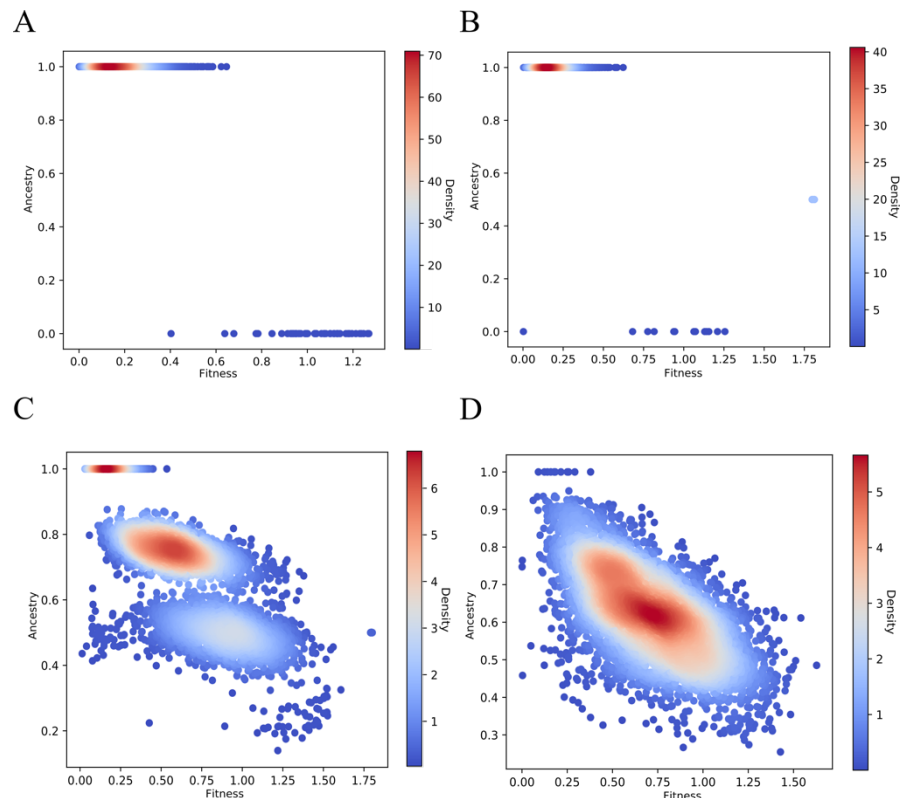

**Figure 3.** Relation between individual fitness and its ancestral genome proportion under demographic Model 2, with recessive deleterious mutations and admixture fraction of 1%. Each dot represents an individual, depicting relation between ancestry proportion and relative fitness (to the mean fitness of the outbred population) of each individual in the inbred recipient population. Figure A shows the population before mating with outbred individuals. Figure B indicates the first generation after admixture (e.g. F1), while figure C represents the second generation (e.g. F2) and figure D shows the third generation (e.g. F3).

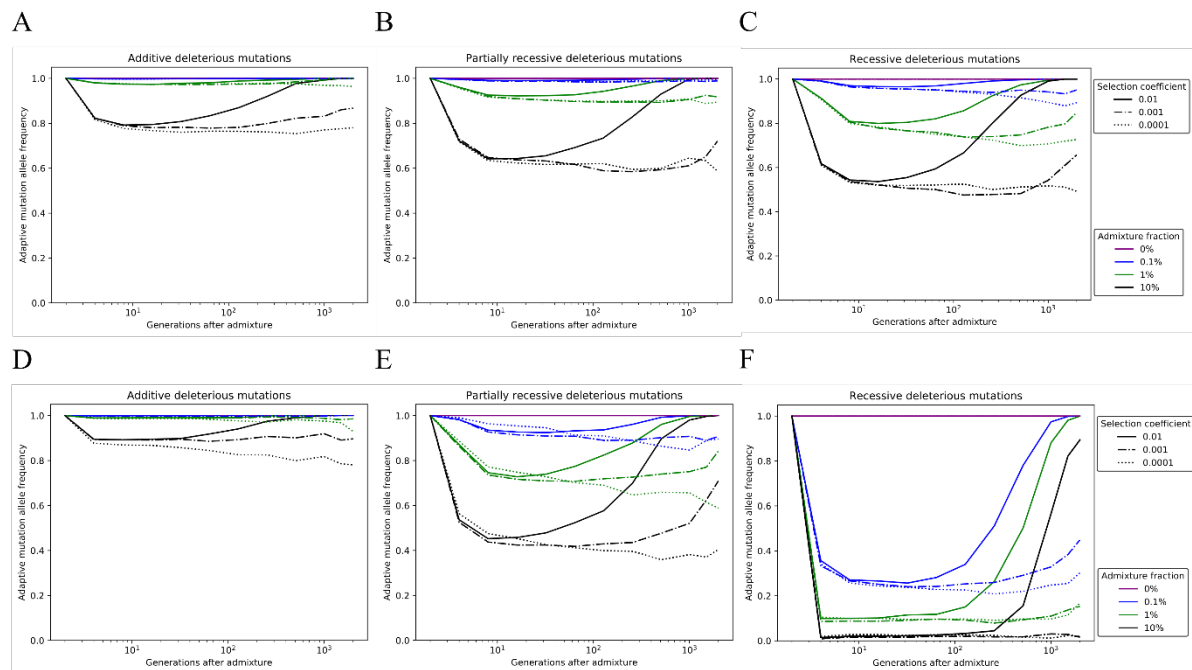

**Figure 4.** Allele frequency changes after admixture for a Mendelian trait under hard sweep selection model and (A-C) demographic Model 1 (D-F) demographic Model 2. The adaptive mutation is additive (dominance coefficient  $h=0.5$ ) while selection coefficient is set differently (shown with different line styles). Deleterious mutations are assumed additive ( $h=0.5$ ) in A, D, partially recessive ( $h=0.1$ ) in figure B,E and recessive ( $h=0$ ) in C,F.

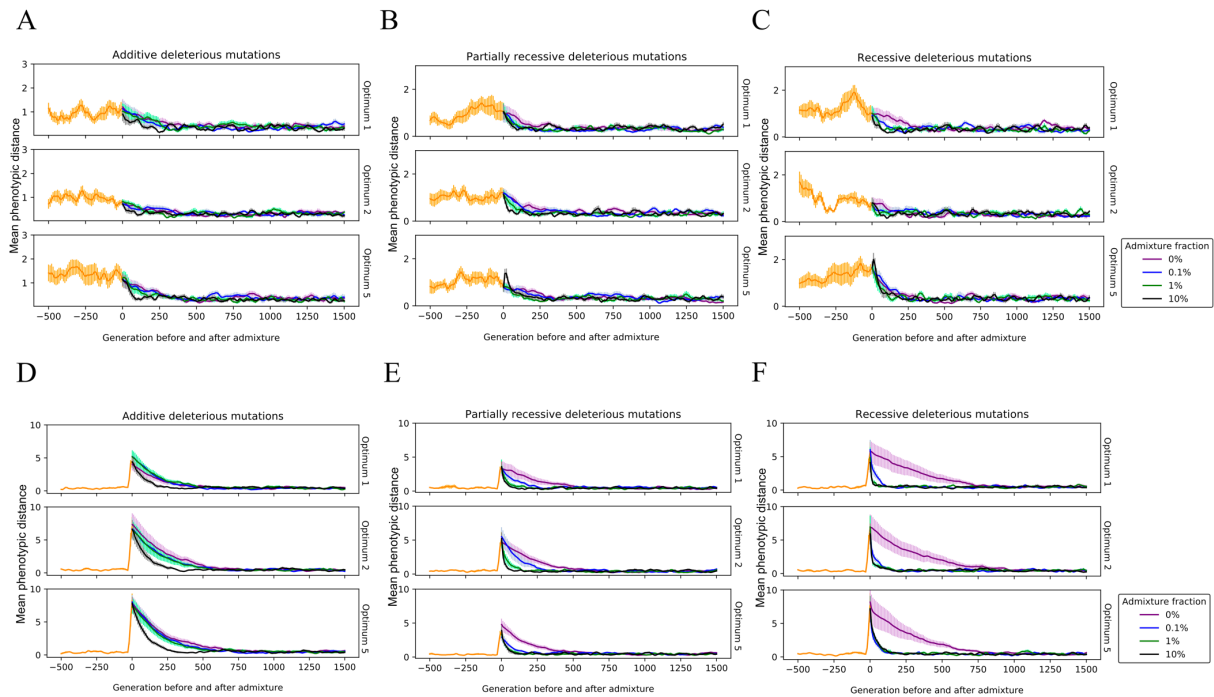

**Figure 5.** Mean phenotype distance from optimum over time. (A-C) Simulations under Model 1, (D-F) simulations under Model 2. Shaded bars signify 95% confidence intervals for the mean phenotypic distance.

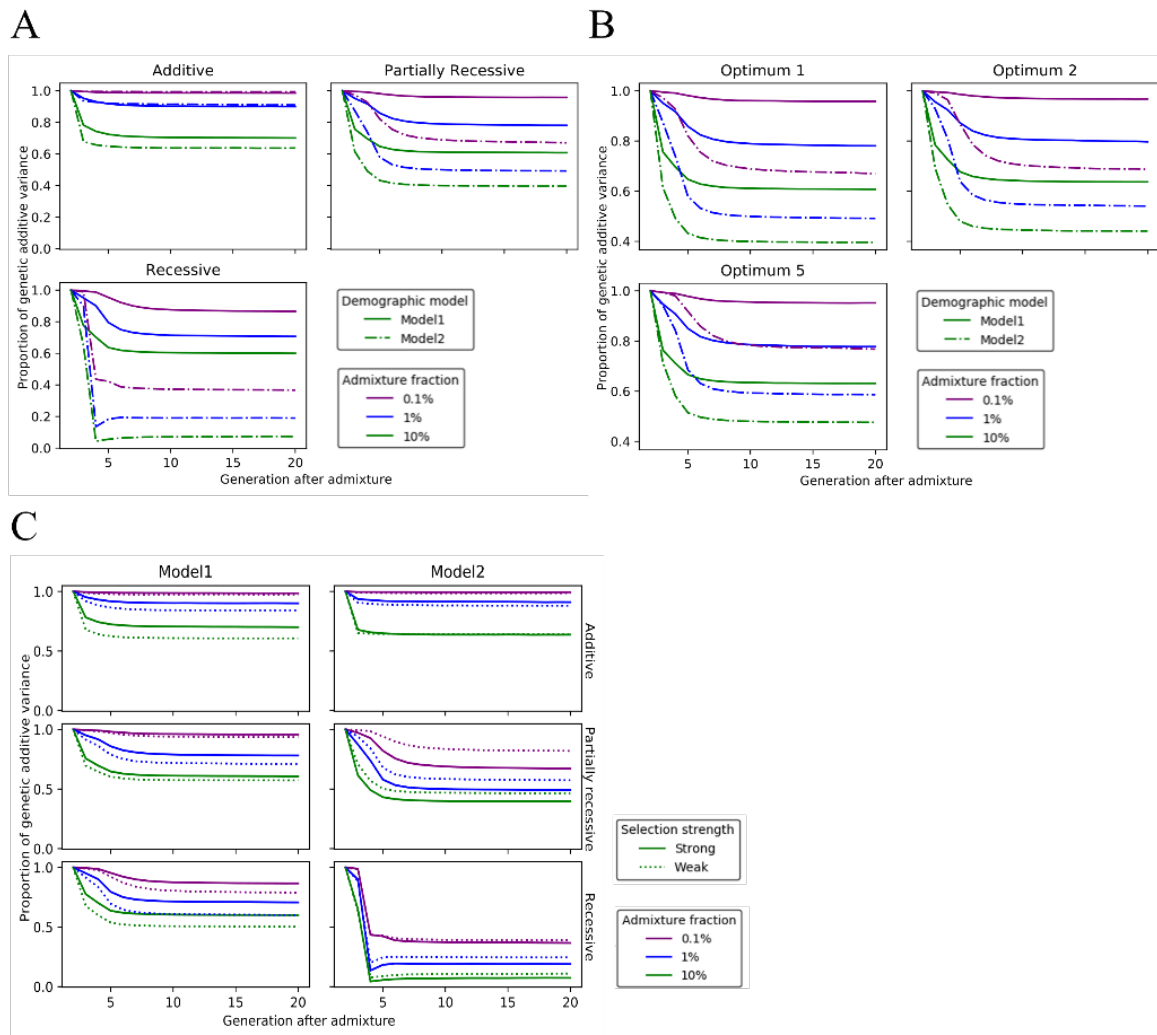

**Figure 6.** Proportion of genetic additive variance of a polygenic adaptation, recording mutations that originate from the recipient population for 20 generations after GR. (A) Scenarios under strong selection, with optimum of 1 for the recipient population and different dominance coefficients for deleterious mutations. (B) Scenarios under strong selection, with partially recessive deleterious mutations and different optimum for the recipient population. (C) Scenarios with optimum equals 1 and different selection strength for the adaptive trait. Each line represents the proportion of genetic additive variance contributed by variants, which compose the trait, from the ancestral genome of inbred population. Here, genetic additive variance is calculated as  $G = \sum_{l \in SNPs} 2a_l^2 p_l(1 - p_l)$ , where  $a_l$  represents the effect of SNP  $l$ , and  $p_l$  its frequency.

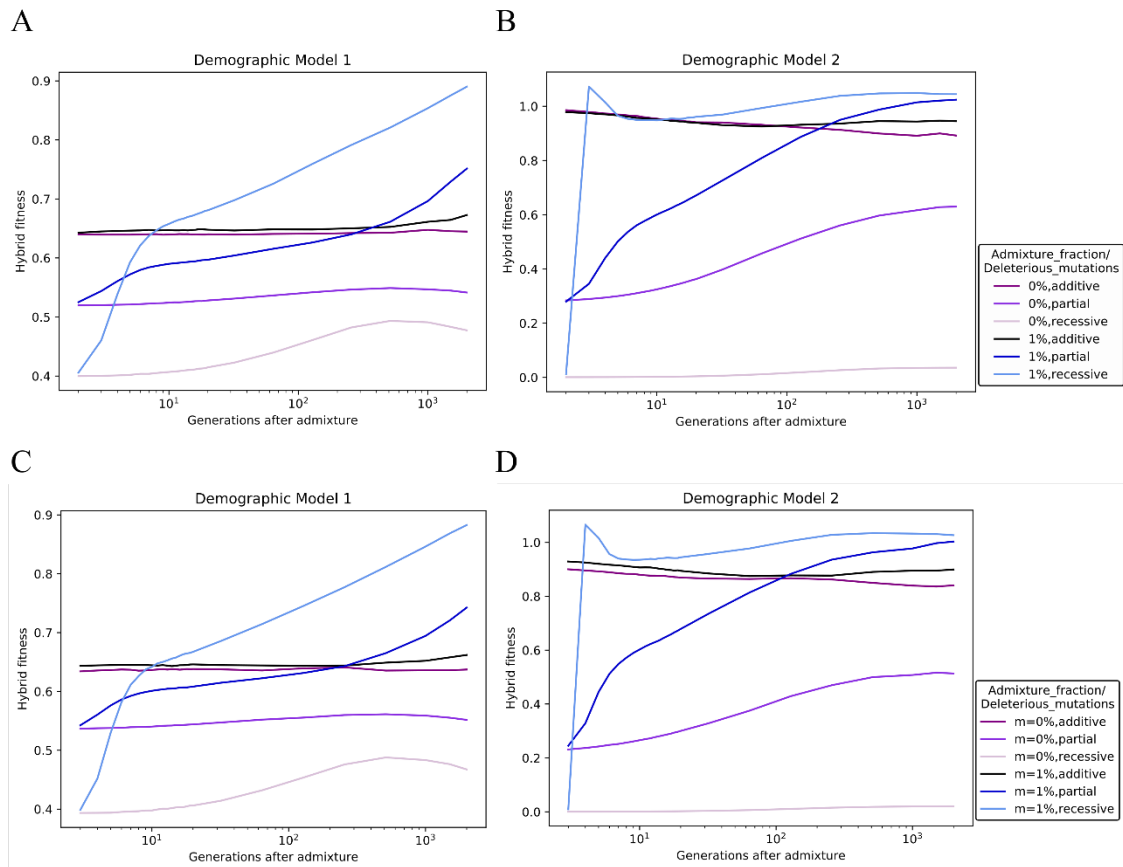

**Figure 7.** Hybrid fitness changes of the inbred population after admixture with (A-B) a Mendelian adaptive trait, under hard sweep selection model and (C-D) a polygenic trait under stabilizing selection with strong selection. Figure A and C are results of demographic Model 1 while B and D are that of demographic Model 2. Lines of different colors are indicating scenarios with different admixture fraction and dominance (of deleterious mutations).
